# Supplementary material for: Curcumin Protects Human Keratinocytes against Inorganic Arsenite-Induced Acute Cytotoxicity through an NRF2-Dependent Mechanism
Source: Hindawi journal article supplement (doi:10.1155/2013/412576), 2013-01-01
Supplement: f1 [file 412576.f1.pdf]

## Supplemental Material,

Table 1:

### Primer sequences for Real-time RT-PCR

| Gene name      | GeneBank Accession | Position  | Forward (5' - 3')              | Reverse (5' - 3')         |
|----------------|--------------------|-----------|--------------------------------|---------------------------|
| <i>NRF1</i>    | NM_003204          | 4172-4259 | GCCCTGTTTCACTTATAGGGTCTAGA     | GGCAAAGAGAACATTTAGCAGCTT  |
| <i>NRF2</i>    | NM-006164          | 398-488   | AACCAGTGGATCTGCCAACTACTC       | CTGCGCCAAAAGCTGCAT        |
| <i>KEAP-1</i>  | NM_012289          | 2257-2342 | CCTCTGGCCGGGTAATAGG            | CCCCTCCCAGGTATCCAAGA      |
| <i>NQO1</i>    | NM_000903          | 2154-2264 | ACTGCCCTCTTGTGGTGCAT           | GCTCGGTCCAATCCCTTCAT      |
| <i>HMOX-1</i>  | NM_002133          | 1216-1294 | GCCTGGAAGACACCCTAATGTG         | GGCCGTGTCAACAAGGATACTT    |
| <i>GCLC</i>    | NM_001498          | 1521-1625 | GATGCTGTCTTGCAAGGAATG          | AGCGAGCTCCGTGCTGTT        |
| <i>GCLM</i>    | NM_002061          | 830-910   | ACAGGTAAAACCAAATAGTAACAAAGTTAA | TGTTTAGCAAATGCAGTCAAATCTG |
| <i>β-ACTIN</i> | X00351             | 1088-1163 | GTCCACCTTCCAGCAGATGTG          | GCATTTGCGGTGGACGAT        |
